# Supplementary material for: Super‐high procoagulant activity of gecko thrombin: A gift from sky dragon
Source: PubMed Central journal article supplement (PMC10493662; doi:10.1111/cns.14250), 2023-05-05

**Full unedited gel/blot for Figure 7**

GFAP

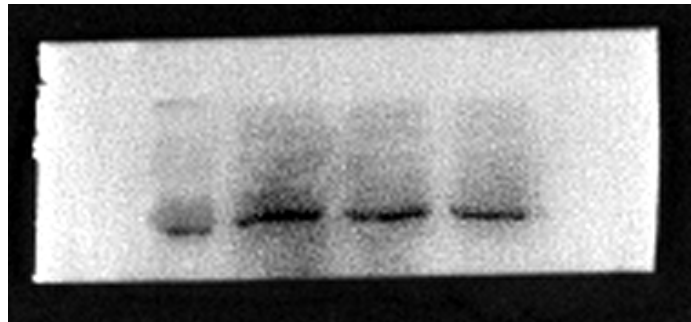

GAPDH

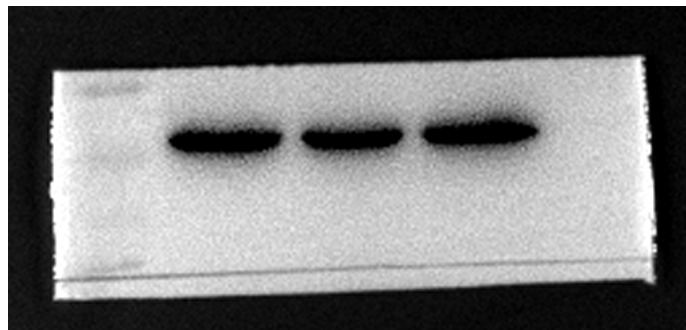

**Full unedited gel/blot for Figure 9**

p-ERK

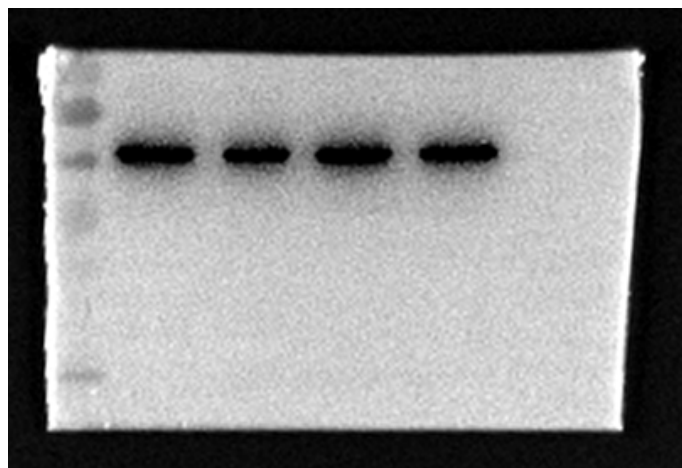

ERK

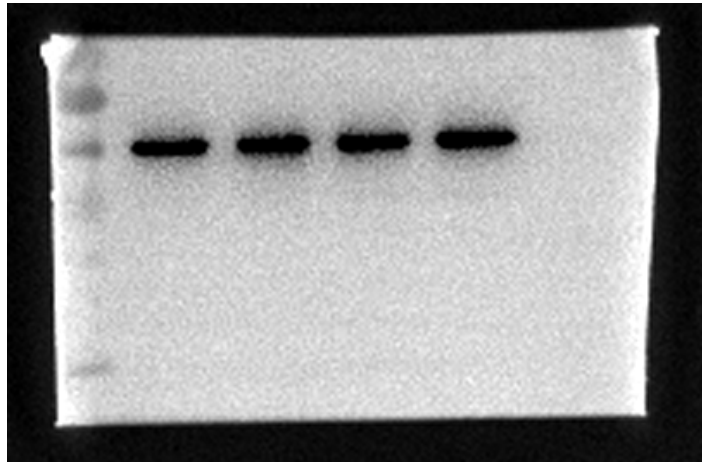

p-P38

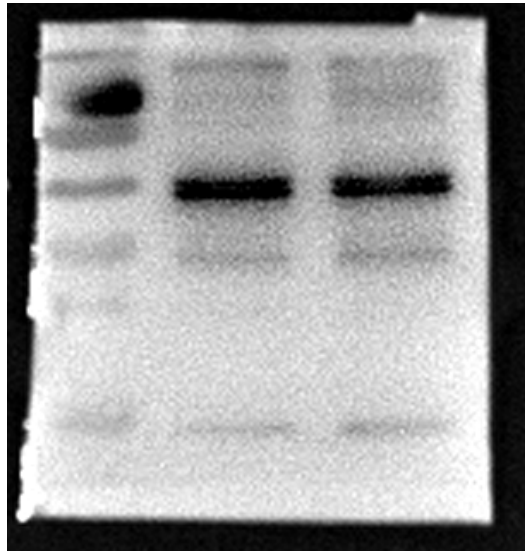

P38

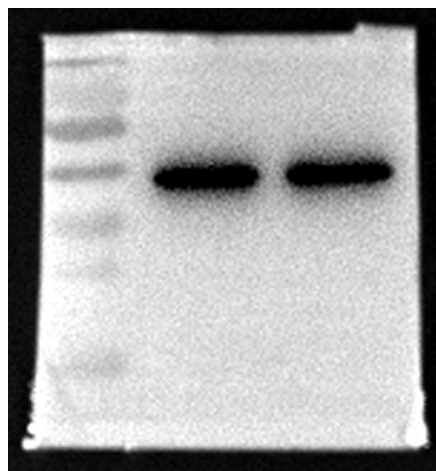

p-JNK

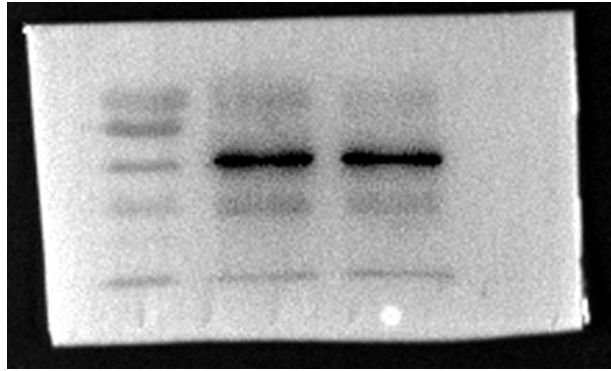

JNK

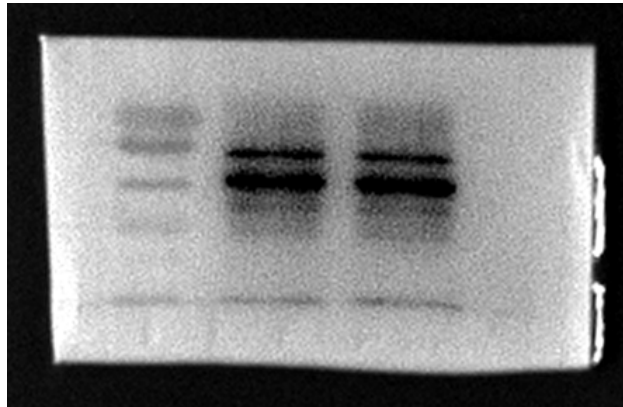

Supplement: CNS-29-3081-s002.pdf [file CNS-29-3081-s002.pdf]
